# Supplementary material for: Dependence of Heart Rate Variability Indices on the Mean Heart Rate in Women with Well-Controlled Type 2 Diabetes
Source: MDPI journal article supplement (doi:10.3390/jcm10194386), 2021-09-25
Supplement: s1 [file s1]

## Supplementary material

**Table S1.** Linear stepwise multiple regression analysis with predicted HRV indices and as independent variables the meanNN, maneuver, diabetes mellitus (DM) condition, age, and BMI. The regression models were applied on the combined samples from supine position and active standing.

| Variables                               | Standardized $\beta$ | $\beta$ (C.I. <sub>95%</sub> ) | P       | R <sup>2</sup> |
|-----------------------------------------|----------------------|--------------------------------|---------|----------------|
| <i>Predicted HRV index: SDNN (ms)</i>   |                      |                                |         | 0.322          |
| meanNN                                  | 0.342                | 49.711 (32.057 – 67.366)       | <0.001  |                |
| Age                                     | -0.427               | -1.074 (-1.39 – -0.76)         | <0.001  |                |
| BMI                                     | 0.186                | 1.520 (0.498– 2.54)            | 0.004   |                |
| DM condition                            |                      | <i>Excluded variable</i>       |         |                |
| Maneuver                                |                      | <i>Excluded variable</i>       |         |                |
| <i>Predicted HRV index: RMSSD (ms)</i>  |                      |                                |         | 0.495          |
| meanNN                                  | 0.586                | 99.895 (82.13–117.66)          | <0.001  |                |
| Age                                     | -0.342               | -1.008 (-1.32– -0.70)          | <0.001  |                |
| Maneuver                                |                      | <i>Excluded variable</i>       |         |                |
| DM condition                            |                      | <i>Excluded variable</i>       |         |                |
| BMI                                     |                      | <i>Excluded variable</i>       |         |                |
| <i>Predicted HRV index: pNN20 (%)</i>   |                      |                                |         | 0.393          |
| meanNN                                  | 0.493                | 55.597 (42.66 – 68.54)         | < 0.001 |                |
| DM condition                            | -0.320               | -12.09 (-16.55 – -7.63)        | <0.001  |                |
| BMI                                     | 0.215                | 1.362(0.61 – 2.11)             | <0.001  |                |
| Age                                     |                      | <i>Excluded variable</i>       |         |                |
| Maneuver                                |                      | <i>Excluded variable</i>       |         |                |
| <i>Predicted HRV index: LF (n.u.)</i>   |                      |                                |         | 0.254          |
| meanNN                                  | -0.246               | -31.060 (-50.09 – -12.03)      | 0.002   |                |
| Maneuver                                | 0.334                | 12.237 (6.71 – 17.76)          | <0.001  |                |
| Age                                     |                      | <i>Excluded variable</i>       |         |                |
| DM condition                            |                      | <i>Excluded variable</i>       |         |                |
| BMI                                     |                      | <i>Excluded variable</i>       |         |                |
| <i>Predicted HRV index: HF (n.u.)</i>   |                      |                                |         | 0.248          |
| meanNN                                  | 0.239                | 30.043 (11.05 – 49.04)         | 0.002   |                |
| Maneuver                                | -0.334               | -12.174 (-17.69 – -6.66)       | <0.001  |                |
| Age                                     |                      | <i>Excluded variable</i>       |         |                |
| DM condition                            |                      | <i>Excluded variable</i>       |         |                |
| BMI                                     |                      | <i>Excluded variable</i>       |         |                |
| <i>Predicted HRV index: log (LF/HF)</i> |                      |                                |         | 0.250          |
| meanNN                                  | -0.238               | -0.686 (-1.12 – -0.25)         | 0.002   |                |
| Maneuver                                | 0.338                | 0.283 (0.156 – 0.409)          | <0.001  |                |
| Age                                     |                      | <i>Excluded variable</i>       |         |                |
| DM condition                            |                      | <i>Excluded variable</i>       |         |                |
| BMI                                     |                      | <i>Excluded variable</i>       |         |                |

**Table S2.** Linear stepwise multiple regression analysis with predicted HRV indices and as independent variables the meanNN, maneuver, diabetes mellitus (DM) condition, age, BMI, glucose, and uric acid. The regression models were applied on the combined samples from supine position and rhythmic breathing.

| Variables                               | Standardized $\beta$ | $\beta$ (C.I. <sub>.95%</sub> ) | P       | R <sup>2</sup> |
|-----------------------------------------|----------------------|---------------------------------|---------|----------------|
| <i>Predicted HRV index: SDNN (ms)</i>   |                      |                                 |         | 0.530          |
| meanNN                                  | 0.242                | 62.477 (33.71 – 91.25)          | <0.001  |                |
| Age                                     | -0.373               | -1.533 (-1.99 – -1.08)          | <0.001  |                |
| Maneuver                                | 0.490                | 17.368 (13.58– 21.16)           | <0.001  |                |
| DM condition                            |                      | <i>Excluded variable</i>        |         |                |
| BMI                                     |                      | <i>Excluded variable</i>        |         |                |
| <i>Predicted HRV index: RMSSD (ms)</i>  |                      |                                 |         | 0.512          |
| meanNN                                  | 0.352                | 84.565 (57.24 – 111.89)         | <0.001  |                |
| Age                                     | -0.439               | -1.681 (-2 .11 – -1.25)         | <0.001  |                |
| Maneuver                                | 0.276                | 9.118 (5.52 – 12 .71)           | <0.001  |                |
| DM condition                            |                      | <i>Excluded variable</i>        |         |                |
| BMI                                     |                      | <i>Excluded variable</i>        |         |                |
| <i>Predicted HRV index: pNN20 (%)</i>   |                      |                                 |         | 0.270          |
| meanNN                                  | 0.370                | 36.457 (23.16 – 49.76)          | < 0.001 |                |
| DM condition                            | -0.316               | -9.522 (-13.54 – -5.51)         | <0.001  |                |
| Maneuver                                | -0.158               | -2.147 (-3.96 – 0.33)           | 0.021   |                |
| Age                                     |                      | <i>Excluded variable</i>        |         |                |
| BMI                                     |                      | <i>Excluded variable</i>        |         |                |
| <i>Predicted HRV index: LF (n.u.)</i>   |                      |                                 |         | 0.549          |
| Age                                     | 0.134                | 0.321 (0.07 – 0.57)             | 0.011   |                |
| Maneuver                                | 0.736                | 15.166 (13.04 – 17.30)          | <0.001  |                |
| meanNN                                  |                      | <i>Excluded variable</i>        |         |                |
| DM condition                            |                      | <i>Excluded variable</i>        |         |                |
| BMI                                     |                      | <i>Excluded variable</i>        |         |                |
| <i>Predicted HRV index: HF (n.u.)</i>   |                      |                                 |         | 0.555          |
| Age                                     | -0.134               | -0.321(-0.57 – -0.08)           | 0.011   |                |
| Maneuver                                | -0.740               | -15.241 (-17.35 – -13.13)       | <0.001  |                |
| meanNN                                  |                      | <i>Excluded variable</i>        |         |                |
| DM condition                            |                      | <i>Excluded variable</i>        |         |                |
| BMI                                     |                      | <i>Excluded variable</i>        |         |                |
| <i>Predicted HRV index: log (LF/HF)</i> |                      |                                 |         | 0.609          |
| Age                                     | 0.123                | 0.007 (0.002 – 0.013)           | 0.012   |                |
| Maneuver                                | 0.777                | 0.391 (0.343 – 0.440)           | <0.001  |                |
| meanNN                                  |                      | <i>Excluded variable</i>        |         |                |
| DM condition                            |                      | <i>Excluded variable</i>        |         |                |
| BMI                                     |                      | <i>Excluded variable</i>        |         |                |
